# Supplementary material
Source: PubMed Central journal article supplement (PMC5513679)
Supplement: NIHMS876739-supplement-Appendix.pdf [file NIHMS876739-supplement-Appendix.pdf]

# Appendix

Ender Konukoglu, Ben Glocker, Antonio Criminisi and Kilian M. Pohl

## APPENDIX A: BOUNDS ON THE LAPLACE SPECTRUM

Li and Yau in [1] proved that the Laplace spectrum has the following universal lower bound

$$\lambda_n \geq \frac{d}{d+2} 4\pi^2 \left( \frac{n}{B_d V} \right)^{2/d} \quad \forall n > 0. \quad (1)$$

We notice that this lower bound does not depend on the shape.

1) *Upper bounds:* Several authors have investigated the upper bounds and the relative growth rate of the eigenvalues of the Dirichlet spectrum [2]. In [3], Yang provides an upper bound for the growth rate of the components for  $n \geq 1$  as

$$\lambda_{n+1} < \left[ 1 + \frac{4}{d} \right] \frac{1}{n} \sum_{m=1}^n \lambda_m. \quad (2)$$

This equation can be transformed into a sequence of upper bounds by only knowing the first eigenvalue  $\lambda_1$ . Although sharp for the first few eigenvalues, the upper bound is too relaxed for the remaining modes. Cheng and Yang in [4] provides a much sharper upper bound for larger values of  $n$  and is valid for  $n \geq 2$ .

$$\lambda_{n+1} \leq C_0(d, n) n^{\frac{2}{d}} \lambda_1, \quad (3)$$

where

$$C_0(d, n) = 1 + \frac{a(\min(d, n-1))}{d}$$

$$a(1) \leq 2.64 \quad a(2) \leq 2.27$$

$$\text{and } a(p) = 2.2 - 4 \log\left(1 + \frac{p-3}{50}\right) \text{ for } p \geq 3,$$

where the bound only depends on the first eigenvalue and furthermore it is consistent with Weyl's asymptotic growth law.

## APPENDIX B: PROOFS OF LEMMAS AND COROLLARIES

Before presenting the proofs for the corollaries let us provide a lemma that will be useful throughout this section.

**Lemma 2.** For any  $a, b \in \mathbb{R}$  such that  $a > b > 0$  the function  $f(a, b) = \frac{a-b}{ab}$  increases monotonously with increasing  $a$  and decreases monotonously with increasing  $b$ .

*Proof:* Since  $f$  is differentiable it suffices to look at its partial derivatives  $\frac{\partial f}{\partial a} = \frac{1}{a^2}$  and  $\frac{\partial f}{\partial b} = -\frac{1}{b^2}$ . ■

**Corollary 1.** Let  $\Omega_\lambda \subset \mathbb{R}^d$  and  $\Omega_\xi \subset \mathbb{R}^d$  be any two closed domains with piecewise smooth boundaries and  $\{\lambda\}_{n=1}^\infty$  and  $\{\xi\}_{n=1}^\infty$  be their Laplace spectrum. Then the weighted spectral distance

$$\rho(\Omega_\lambda, \Omega_\xi) = \left[ \sum_{n=1}^\infty \left( \frac{|\lambda_n - \xi_n|}{\lambda_n \xi_n} \right)^p \right]^{1/p}$$

converges for  $p > \frac{d}{2}$ . Furthermore,

$$\rho(\Omega_\lambda, \Omega_\xi) < \left\{ C + K \cdot \left[ \zeta \left( \frac{2p}{d} \right) - 1 - \left( \frac{1}{2} \right)^{\frac{2p}{d}} \right] \right\}^{\frac{1}{p}}, \quad (4)$$

where  $\zeta(\cdot)$  is the Riemann zeta function and the coefficients  $C$  and  $K$  are given as

$$C \triangleq \sum_{i=1,2} \left[ \frac{d+2}{d \cdot 4\pi^2} \cdot \left( \frac{B_d \hat{V}}{i} \right)^{\frac{2}{d}} - \frac{1}{\mu} \cdot \left( \frac{d}{d+4} \right)^{i-1} \right]^p$$

$$K \triangleq \left[ \frac{d+2}{d \cdot 4\pi^2} \cdot (B_d \hat{V})^{\frac{2}{d}} - \frac{1}{\mu} \cdot \frac{d}{d+2.64} \right]^p$$

$$\hat{V} \triangleq \max(V(\Omega_\lambda), V(\Omega_\xi)), \quad \mu \triangleq \max(\lambda_1, \xi_1),$$

where  $V(\cdot)$  denotes the volume (or area in 2D) of an object.

*Proof:* The following inequality results from combining the bounds specified in Section with Lemma -1

$$\frac{|\lambda_n - \xi_n|}{\lambda_n \xi_n} < \frac{d+2}{d \cdot 4\pi^2} \cdot \left( \frac{B_d \hat{V}}{n} \right)^{\frac{2}{d}} - \frac{1}{\mu} \cdot \left( \frac{d}{d+4} \right)^{n-1}$$

for  $n = 1, 2$  and for  $n \geq 3$

$$\frac{|\lambda_n - \xi_n|}{\lambda_n \xi_n} < \frac{d+2}{d \cdot 4\pi^2} \cdot \left( \frac{B_d \hat{V}}{n} \right)^{\frac{2}{d}} - \frac{1}{\mu} \cdot \frac{1}{C_0(d, n) n^{\frac{2}{d}}}$$

$$\leq \frac{d+2}{d \cdot 4\pi^2} \cdot \left( \frac{B_d \hat{V}}{n} \right)^{\frac{2}{d}} - \frac{1}{\mu} \cdot \frac{d}{(d+2.64)n^{\frac{2}{d}}},$$

Based on this component-wise bound we can write the infinite sum without the first two terms as

$$\sum_{n=3}^\infty \left( \frac{|\lambda_n - \xi_n|}{\lambda_n \xi_n} \right)^p < K \sum_{n=3}^\infty \left( \frac{1}{n} \right)^{\frac{2p}{d}},$$

which for  $p > \frac{d}{2}$  converges to

$$K \sum_{n=3}^\infty \left( \frac{1}{n} \right)^{\frac{2p}{d}} = \zeta \left( \frac{2p}{d} \right) - 1 - \left( \frac{1}{2} \right)^{\frac{2p}{d}}$$

and diverges for  $p \leq \frac{d}{2}$ . Consequently,  $\rho(\Omega_\lambda, \Omega_\xi)$  converges for  $p > \frac{d}{2}$ . Furthermore, extending the sum with the upper bounds for  $n = 1, 2$  the following upper bound for the distance between  $\Omega_\lambda$  and  $\Omega_\xi$  holds

$$\rho(\Omega_\lambda, \Omega_\xi) < \left\{ C + K \cdot \left[ \zeta \left( \frac{2p}{d} \right) - 1 - \left( \frac{1}{2} \right)^{\frac{2p}{d}} \right] \right\}^{\frac{1}{p}}. \quad \blacksquare$$

**Corollary 2.**  $\rho(\Omega_\lambda, \Omega_\xi)$  is a pseudometric for  $d \geq 2$ .

To ease notation we define

$$\varrho_n(\Omega_\lambda, \Omega_\xi) \triangleq \frac{|\lambda_n - \xi_n|}{\lambda_n \xi_n}.$$

This leads to

$$\rho(\Omega_\lambda, \Omega_\xi) = \left[ \sum_{n=1}^{\infty} \varrho_n^p(\Omega_\lambda, \Omega_\xi) \right]^{\frac{1}{p}}.$$

*Proof:*  $\forall \Omega_\lambda \subset \mathbb{R}^d, \Omega_\xi \subset \mathbb{R}^d$  The first three points for this proof are trivial:

- $\rho(\Omega_\lambda, \Omega_\xi) > 0$  since  $\varrho_n(\Omega_\lambda, \Omega_\xi) > 0 \forall n$ .
- $\rho(\Omega_\lambda, \Omega_\lambda) = 0$  since  $|\lambda_n - \lambda_n| = 0 \forall n$ .
- $\rho(\Omega_\lambda, \Omega_\xi) = \rho(\Omega_\xi, \Omega_\lambda)$  since  $|\lambda_n - \xi_n| = |\xi_n - \lambda_n| \forall n$

In order to prove the triangle inequality let us proceed with the case  $\lambda_n \geq \xi_n$ . The inverse case follows exactly the same way. Now, let  $\Omega_\eta \subset \mathbb{R}^d$  be an arbitrary closed domain with piecewise smooth boundaries whose spectrum is given as  $\{\eta_n\}_{n=1}^{\infty}$ . Investigating

$$\frac{|\lambda_n - \eta_n|}{\lambda_n \eta_n} + \frac{|\eta_n - \xi_n|}{\eta_n \xi_n}$$

we notice that for each  $n$  there are only three possible cases:

- 1)  $\lambda_n \geq \eta_n \geq \xi_n$ , for which

$$\varrho_n(\Omega_\lambda, \Omega_\eta) + \varrho_n(\Omega_\eta, \Omega_\xi) = \varrho_n(\Omega_\lambda, \Omega_\xi),$$

- 2)  $\lambda_n \geq \xi_n \geq \eta_n$ , for which  $\varrho_n(\Omega_\lambda, \Omega_\eta) \geq \varrho_n(\Omega_\lambda, \Omega_\xi)$  as a result of the Lemma -1. Due  $\varrho_n(\Omega_\xi, \Omega_\eta) \geq 0$ :

$$\varrho_n(\Omega_\lambda, \Omega_\eta) + \varrho_n(\Omega_\eta, \Omega_\xi) \geq \varrho_n(\Omega_\lambda, \Omega_\xi)$$

- 3)  $\eta_n \geq \lambda_n \geq \xi_n$ , for which  $\varrho_n(\Omega_\eta, \Omega_\xi) \geq \varrho_n(\Omega_\lambda, \Omega_\xi)$  as a result of the Lemma -1 once again. And as in the previous case, due to  $\varrho_n(\Omega_\eta, \Omega_\lambda) \geq 0$  we have

$$\varrho_n(\Omega_\lambda, \Omega_\eta) + \varrho_n(\Omega_\eta, \Omega_\xi) \geq \varrho_n(\Omega_\lambda, \Omega_\xi).$$

Thus  $\forall n \varrho_n(\Omega_\lambda, \Omega_\eta) + \varrho_n(\Omega_\eta, \Omega_\xi) \geq \varrho_n(\Omega_\lambda, \Omega_\xi)$ . Since  $p > 1$  as  $p > \frac{d}{2}$  for  $d \geq 2$  the Minkowski Inequality states

$$\begin{aligned} \rho(\Omega_\lambda, \Omega_\eta) + \rho(\Omega_\eta, \Omega_\xi) &= \left[ \sum_{n=1}^{\infty} \varrho_n^p(\Omega_\lambda, \Omega_\eta) \right]^{\frac{1}{p}} + \left[ \sum_{n=1}^{\infty} \varrho_n^p(\Omega_\eta, \Omega_\xi) \right]^{\frac{1}{p}} \\ &\geq \left[ \sum_{n=1}^{\infty} (\varrho_n(\Omega_\lambda, \Omega_\eta) + \varrho_n(\Omega_\eta, \Omega_\xi))^p \right]^{\frac{1}{p}}. \end{aligned}$$

When combined with the previous results, the outcome is the triangle inequality:

$$\rho(\Omega_\lambda, \Omega_\eta) + \rho(\Omega_\eta, \Omega_\xi) \geq \rho(\Omega_\lambda, \Omega_\xi)$$

■

**Lemma 1.** Let  $\Omega_\lambda \mathbb{R}^d$  represent an object with piecewise smooth boundary and  $\mathcal{D}(l, t) \triangleq \frac{e^{-\lambda_l t}}{\mathcal{Z}(t)}$  be the corresponding influence ratio of mode  $l$  at  $t$ . Then for any two spectral indices  $m > n > 0$

$$\mathcal{D}(n, t) > \mathcal{D}(m, t), \quad \forall t > 0$$

and particularly for two  $t$  values such that  $t_1 > t_2$

$$\frac{\mathcal{D}(m, t_1)}{\mathcal{D}(n, t_1)} < \frac{\mathcal{D}(m, t_2)}{\mathcal{D}(n, t_2)}.$$

*Proof:* The proof follows the properties of the exponential function and the properties of the spectrum of the Laplace operator. For  $n < m$  we know that  $\lambda_n < \lambda_m$  which leads to  $e^{-\lambda_n t} > e^{-\lambda_m t} \forall t > 0$ . Since the denominators are the same for both  $\mathcal{D}(n, t)$  and  $\mathcal{D}(m, t)$  then

$$\mathcal{D}(n, t) > \mathcal{D}(m, t) \quad \forall t > 0.$$

For the second part of the lemma, we first compute the ratio

$$\frac{\mathcal{D}(m, t)}{\mathcal{D}(n, t)} = e^{-(\lambda_m - \lambda_n)t}.$$

Now based on  $\lambda_m > \lambda_n$  and  $e^{-(\lambda_m - \lambda_n)t}$  is monotonously decreasing with increasing  $t$ , it follows for  $t_1 > t_2$  that

$$\frac{\mathcal{D}(m, t_1)}{\mathcal{D}(n, t_1)} = e^{-(\lambda_m - \lambda_n)t_1} < e^{-(\lambda_m - \lambda_n)t_2} = \frac{\mathcal{D}(m, t_2)}{\mathcal{D}(n, t_2)}.$$

■

**Corollary 3.** Let  $\Omega_\lambda$  and  $\Omega_\xi$  be two objects with piecewise smooth boundaries. Then for any two scalars with  $p > d/2$ ,  $q > d/2$ ,  $p \geq q$  and for all  $n$  with  $|\lambda_n - \xi_n| > 0$  there exists a  $M > n$  so that  $\forall m \geq M$

$$\frac{\left( \frac{|\lambda_m - \xi_m|}{\lambda_m \xi_m} \right)^p}{\left( \frac{|\lambda_n - \xi_n|}{\lambda_n \xi_n} \right)^p} \leq \frac{\left( \frac{|\lambda_m - \xi_m|}{\lambda_m \xi_m} \right)^q}{\left( \frac{|\lambda_n - \xi_n|}{\lambda_n \xi_n} \right)^q}$$

*Proof:* From Corollary 1 we know that the series

$$\sum_{m=1}^{\infty} \left( \frac{|\lambda_m - \xi_m|}{\lambda_m \xi_m} \right)^q$$

converges. Then based on Cauchy's convergence criterion for series

$$\lim_{n \rightarrow \infty} \left( \frac{|\lambda_m - \xi_m|}{\lambda_m \xi_m} \right)^q = 0.$$

In other words,  $\forall \epsilon > 0$  there exists a  $M$  such that

$$\left( \frac{|\lambda_m - \xi_m|}{\lambda_m \xi_m} \right)^q < \epsilon, \quad \forall m > M.$$

Let  $n$  be an arbitrary index such that  $|\lambda_n - \xi_n| > 0$ . Consequently, also for  $|\lambda_n - \xi_n|$ , there exists a  $M$  such that  $\forall m > M$

$$\frac{\left( \frac{|\lambda_m - \xi_m|}{\lambda_m \xi_m} \right)^q}{\left( \frac{|\lambda_n - \xi_n|}{\lambda_n \xi_n} \right)^q} < 1.$$

Since  $p \geq q$  we can find a  $k \geq 1$  such that  $p = kq$ . Then based on the above inequality  $\forall m > M$

$$\begin{aligned} \frac{\left( \frac{|\lambda_m - \xi_m|}{\lambda_m \xi_m} \right)^p}{\left( \frac{|\lambda_n - \xi_n|}{\lambda_n \xi_n} \right)^p} &= \left[ \frac{\left( \frac{|\lambda_m - \xi_m|}{\lambda_m \xi_m} \right)^q}{\left( \frac{|\lambda_n - \xi_n|}{\lambda_n \xi_n} \right)^q} \right]^k \\ &\leq \frac{\left( \frac{|\lambda_m - \xi_m|}{\lambda_m \xi_m} \right)^q}{\left( \frac{|\lambda_n - \xi_n|}{\lambda_n \xi_n} \right)^q} \end{aligned}$$

■ result of Corollary 1 as

**Corollary 4.** Let  $\rho^N(\Omega_\lambda, \Omega_\xi)$  be the truncated approximation of  $\rho(\Omega_\lambda, \Omega_\xi)$  based on the first  $N$  modes and  $\bar{\rho}^N(\Omega_\lambda, \Omega_\xi)$  of  $\bar{\rho}(\Omega_\lambda, \Omega_\xi)$ . Then  $\forall p > d/2$

$$\lim_{N \rightarrow \infty} |\rho - \rho^N| = 0$$

and

$$\lim_{N \rightarrow \infty} |\bar{\rho} - \bar{\rho}^N| = 0.$$

Furthermore, for a given  $N \geq 3$  the truncation errors  $|\rho - \rho^N|$  and  $|\bar{\rho} - \bar{\rho}^N|$  can be bounded by

$$\begin{aligned} |\rho - \rho^N| &< \left\{ C + K \cdot \left[ \zeta \left( \frac{2p}{d} \right) - 1 - \left( \frac{1}{2} \right)^{\frac{2p}{d}} \right] \right\}^{\frac{1}{p}} \\ &\quad - \left\{ C + K \cdot \left[ \sum_{n=3}^N \left( \frac{1}{n} \right)^{\frac{2p}{d}} \right] \right\}^{\frac{1}{p}} \\ |\bar{\rho} - \bar{\rho}^N| &< 1 - \left\{ \frac{C + K \cdot \left[ \sum_{n=3}^N \left( \frac{1}{n} \right)^{\frac{2p}{d}} \right]}{C + K \cdot \left[ \zeta \left( \frac{2p}{d} \right) - 1 - \left( \frac{1}{2} \right)^{\frac{2p}{d}} \right]} \right\}^{\frac{1}{p}} \end{aligned} \quad (5)$$

*Proof:* As before, to ease notation, let us again define

$$\varrho_n \triangleq \frac{|\lambda_n - \xi_n|}{\lambda_n \xi_n}. \quad (7)$$

Then based on Corollary 1 we know that the sum  $\sum_{n=1}^{\infty} \varrho_n^p$  exists and thus also the partial sums converge

$$\lim_{N \rightarrow \infty} \left| \sum_{n=1}^{\infty} \varrho_n^p - \sum_{n=1}^N \varrho_n^p \right| = \lim_{N \rightarrow \infty} \sum_{n=1}^{\infty} \varrho_n^p - \sum_{n=1}^N \varrho_n^p = 0.$$

Based on

$$\forall a, b, d \in \mathbb{R} \text{ with } a, b, d \geq 0 \text{ and } a^d - b^d \rightarrow 0 \Rightarrow a - b \rightarrow 0$$

and

$$\varrho_n \succeq 0$$

we reach

$$\lim_{N \rightarrow \infty} |\rho - \rho^N| = \lim_{N \rightarrow \infty} \left[ \sum_{n=1}^{\infty} \varrho_n^p \right]^{\frac{1}{p}} - \left[ \sum_{n=1}^N \varrho_n^p \right]^{\frac{1}{p}} = 0$$

As the denominators for both  $\bar{\rho}^N$  and  $\bar{\rho}$  are the same, the above limit also yields  $\lim_{N \rightarrow \infty} |\bar{\rho} - \bar{\rho}^N| = 0$ .

The upper bounds for the truncation errors now is a direct

$$\begin{aligned} |\rho - \rho^N| &= \left[ \sum_{n=1}^{\infty} \varrho_n^p \right]^{\frac{1}{p}} - \left[ \sum_{n=1}^N \varrho_n^p \right]^{\frac{1}{p}} \\ &< \left\{ C + K \cdot \left[ \zeta \left( \frac{2p}{d} \right) - 1 - \left( \frac{1}{2} \right)^{\frac{2p}{d}} \right] \right\}^{\frac{1}{p}} \\ &\quad - \left\{ C + K \cdot \left[ \sum_{n=3}^N \left( \frac{1}{n} \right)^{\frac{2p}{d}} \right] \right\}^{\frac{1}{p}} \\ |\bar{\rho} - \bar{\rho}^N| &= \frac{[\sum_{n=1}^{\infty} \varrho_n^p]^{1/p} - [\sum_{n=1}^N \varrho_n^p]^{1/p}}{\{C + K (\zeta(2p/d) - 1 - 1/2^{2p/d})\}^{1/p}} \\ &< 1 - \left\{ \frac{C + K \cdot \left[ \sum_{n=3}^N \left( \frac{1}{n} \right)^{\frac{2p}{d}} \right]}{C + K \cdot \left[ \zeta \left( \frac{2p}{d} \right) - 1 - \left( \frac{1}{2} \right)^{\frac{2p}{d}} \right]} \right\}^{\frac{1}{p}} \end{aligned}$$

■ **Proposition 1.** Let  $x, y \in \mathbb{R}$  be positive real values such that  $y > x$ . Then  $\forall A, B \in \mathbb{R}, A, B > 0$

$$\frac{A + Bx}{A + By} > \frac{x}{y}.$$

*Proof:* Since  $A, x, y > 0$ , we can find two positive real values  $k_1 > 0$  and  $k_2 > 0$  such that  $A = k_1x$  and  $A = k_2y$ . Furthermore,  $y > x$  simply implies  $k_1 > k_2$ . Using  $k_1$  and  $k_2$  now we can write

$$\frac{A + Bx}{A + By} = \frac{k_1x + Bx}{k_2y + By} > \frac{k_2x + Bx}{k_2y + By} = \frac{x}{y}.$$

■

## REFERENCES

- [1] P. Li and S. Yau, "On the Schrödinger equation and the eigenvalue problem," *Communications in Mathematical Physics*, vol. 88, pp. 309–18, 1983.
- [2] M. Protter, "Can one hear the shape of a drum? Revisited," *SIAM Review*, vol. 29, no. 2, pp. 185 – 197, June 1987.
- [3] H. Yang, "Estimates of the difference between consecutive eigenvalues," *preprint*, 1991.
- [4] Q. Cheng and H. Yang, "Bounds on eigenvalues of the Dirichlet Laplacian," *Mathematische Annalen*, vol. 337, pp. 159–175, 2007.
